# Supplementary material for: Administration of Mucuna Beans (Mucuna Pruriences (L.) DC. Var. Utilis) Improves Cognition and Neuropathology of 3×Tg-AD Mice
Source: Research Square preprint supplement (doi:10.21203/rs.3.rs-885340/v1), 2021-09-20
Supplement: Supplementary file 5 [file a4d2c509a549be98f7c2c377.xlsx]

## Sheet: Sheet1
	Supplementary Dataset 4: Striatum phosphorylated tau blots
	Figure 4. Immunoblotting analysis of phosphorylated tau in the Sarkosyl-insoluble fraction.
	Striutum
		Control		Mucuna			Control		Mucuna
	#7-9 of Control and #5-7 of Mucuna were chozen for Figure 4.
